# Supplementary material for: Non-canonical H3K79me2-dependent pathways promote the survival of MLL-rearranged leukemia
Source: eLife. 2021 Jul 15;10:e64960. doi: 10.7554/eLife.64960 (PMC8315800; doi:10.7554/eLife.64960)
Supplement: Supplementary file 1. [file elife-64960-supp1.xlsx]

## Sheet: Sheet1
qPCR oligos
gene	sequence	reference
HLD-DRA qPCR F	CTCAGGAATCATGGGCTATCAA
HLA-DRA qPCR R	CTCATCACCATCAAAGTCAAACAT
HLA-DRB1 qPCR F	GTGACACTGATGGTGCTGAG
HLA-DRB1 qPCR R	GCTCCGTCCCATTGAAGAAA
MEF2C qPCR F	GTCTGAGGACAAGTACAGGAAAA
MEF2C qPCR R	GAGACTGGCATCTCGAAGTT
FLT3 qPCR F	ATCATATCCCATGGTATCAGAATCC
FLT3 qPCR R	GAAGCAGATACATCCACTTCCA
ARID3B qPCR F	AGACCATACCAAAGATGCTTCC
ARID3B qPCR R	ATCATCACTCCAGGCCAAAC
STAT5A qPCR F	CAGATGCAGGTGCTGTACG
STAT5A qPCR R	TGTCCAAGTCAATGGCATCC
PIM2 qPCR F	ATGTTGACCAAGCCTCTACA
PIM2 qPCR R	TCGATACTCGGCCTCGAA
MEIS1 qPCR F	AGACGATAGAGAAGGAGGATCAA
MEIS1 qPCR R	CCGTGTCATCATGATCTCTGTT
HOXA9 qPCR F	AGGCGCCTTCTCTGAAA
HOXA9 qPCR R	GTTGGCTGCTGGGTTATTG
PBX3 qPCR F	CCACCAGATCATGACCATCAC
PBX3 qPCR R	AAGAGCGCTGGTTTCATTCT
CEBPA qPCR F	CCTTCAACGACGAGTTCCT
CEBPA qPCR R	GCCCGGGTAGTCAAAGTC
CSF1R qPCR F	GCCATCCACCTCTATGTCAAA
CSF1R qPCR R	AGCAGACAGGGCAGTAGT
B2M qPCR F	CTCTCTCTTTCTGGCCTGGAG
B2M qPCR R	TCTGCTGGATGACGTGAGTA
SPI1 qPCR F	TGCCCTATGACACGGATCTA
SPI1 qPCR R	GTCCCAGTAATGGTCGCTATG
CSF3R qPCR F	CTATGGCAAGGCTGGGAAA
CSF3R qPCR R	GGGCTGAGACACTGATGTG
PIM1 qPCR F	GTGGAGAAGGACCGGATTTC
PIM1 qPCR R	TTCTTCAGCAGGACCACTTC
PBX3 qPCR F	CAAAGAAACATGCCCTGAACTG
PBX3 qPCR R	CTCTGATGCTGAGACCTGTTT
18S (RNA18S5) F	CGCAGCTAGGAATAATGGAATAGG
18S (RNA18S5) R	GCCTCAGTTCCGAAAACCAA
CIITA qPCR F	CTGTGCCTCTACCACTTCTATG
CIITA qPCR R	GTCGCAGTTGATGGTGTCT
EZH2 qPCR F	GGAGGATCACCGAGATGATAAAG
EZH2 qPCR R	TTCTGCTGTGCCCTTATCTG
EED qPCR F	CTGGCACAGTAAAGAAGGAGAT
EED qPCR R	GCATCAGCATCCACGTAAGA
MEF2C promoter qPCR F	TCTGGACGAGTCTGGTTACTT
MEF2C promoter qPCR R	AGGAAGAAGGAGGAGGAAGAG
PIM1 promoter qPCR F	ctcagcgaaacggagagc
PIM1 promoter qPCR R	cgtatcgattcaaacccaaacaa
FLT3 promoter qPCR F	ctttctcagggcctcaaagat
FLT3 promoter qPCR R	ccgaactctgtcgtttggat
ARID3B promoter qPCR F	acgagaacctctgaggaaga
ARID3B promoter qPCR R	gctgggaggaaagtaactaaaga
CSF3R promoter qPCR F	GCAGAACCATTGTGGGTAAAC
CSF3R promoter qPCR R	ggcagatggagaaacaggaa
BCL6 promoter qPCR F	agctcgatctgctgagtttatg
BCL6 promoter qPCR R	gcctctggaattctgagaactaat
HOXA9 promoter qPCR F	GCCTTATGGCATTAAACCTGAAC
HOXA9 promoter qPCR R	GAGGAGAACCACAAGCATAGTC
MEIS1 promoter qPCR F	GGAGAGAGAGGGAGAGAAAGAA
MEIS1 promoter qPCR R	CAAATGCACAAAGCCCTAGC
HLA-DRA promoter qPCR F	CAGAGCGCCCAAGAAGAA
HLA-DRA promoter qPCR R	cctcagcacctacCTTTGATAG
intergenic qPCR F	TACACGACAGAGGACTGGAA
intergenic qPCR R	CCTTCATGGGTGAGGGTAATG
shRNA oligos	sequence	reference
scrambled shRNA F	CCGG TTCTCCGAACGTGTCACGTTT CTCGAG AAACGTGACACGTTCGGAGAA TTTTT	118
scrambled shRNA R	AATTAAAAA TTCTCCGAACGTGTCACGTTT CTCGAG AAACGTGACACGTTCGGAGAA	118
FLT3 shRNA F	CCGG GCATCCCAGTCAATCAGCTTT CTCGAG AAAGCTGATTGACTGGGATGC TTTTT	79
FLT3 shRNA R	AATTAAAAA GCATCCCAGTCAATCAGCTTT CTCGAG AAAGCTGATTGACTGGGATGC	79
GFP shRNA F	CCGG GCAAGCTGACCCTGAAGTTCAT CTCGAG ATGAACTTCAGGGTCAGCTTGC TTTTT	119
GFP shRNA R	AATTAAAAA GCAAGCTGACCCTGAAGTTCAT CTCGAG ATGAACTTCAGGGTCAGCTTGC	119
