# Supplementary material for: Non-canonical H3K79me2-dependent pathways promote the survival of MLL-rearranged leukemia
Source: eLife. 2021 Jul 15;10:e64960. doi: 10.7554/eLife.64960 (PMC8315800; doi:10.7554/eLife.64960)
Supplement: Supplementary file 2. [file elife-64960-supp2.xlsx]

## Sheet: Sheet1
Western blotting
target	provider	cat #	lot #
HOXA9	Proteintech	18501-1-AP	NA
MEIS1	EMD Millipore	ABE2864	Q2933434
H3	Active Motif	61277
H3K79me2	Abcam	ab3594	GR173874
H3K27me3	Cell Signaling	9733S	14
H3K4me3	Cell Signaling	9751S	9
H4	Active Motif	61299
H2B	Proteintech	2S2899-2
FLT3	Cell Signaling	3462S	14
GAPDH	Cell Signaling	5174S	7
STAT5A	Cell Signaling	94205T	1
p-STAT5	Cell Signaling	9359S	9
EZH2	Cell Signaling	5246S	1
LEDGF	Bethyl	A300-848A	A300-848A-1
RBBP5	Bethyl	A300-109A	3
HNRNPK	Abcam	ab70492	GR175966-6
MBD3	Bethyl	A302-529A	A302-529A-1
anti-rabbit	Cell Signaling	7074S
anti-mouse	Thermo Scientific	31432
ICeChIP-seq
target	provider	cat #	lot #
H3K79me2	Abcam	ab3594	GR173874
H3K27me3	Cell Signaling	9733	8
H3K4me3	Abcam	12209	GR275790-1
